# Supplementary material for: Measurement of ambient NO 3 reactivity: design, characterization and first deployment of a new instrument
Source: Copernicus journal article supplement (doi:10.5194/amt-10-1241-2017), 2017-03-30
Supplement: Supplementary file 1 [file amt-10-1241-2017-supplement.pdf]

Supplement of Atmos. Meas. Tech., 10, 1241–1258, 2017  
<http://www.atmos-meas-tech.net/10/1241/2017/>  
doi:10.5194/amt-10-1241-2017-supplement  
© Author(s) 2017. CC Attribution 3.0 License.

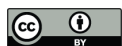

*Supplement of*

## **Measurement of ambient NO<sub>3</sub> reactivity: design, characterization and first deployment of a new instrument**

**Jonathan M. Liebmann et al.**

*Correspondence to:* John N. Crowley ([john.crowley@mpic.de](mailto:john.crowley@mpic.de))

The copyright of individual parts of the supplement might differ from the CC-BY 3.0 licence.

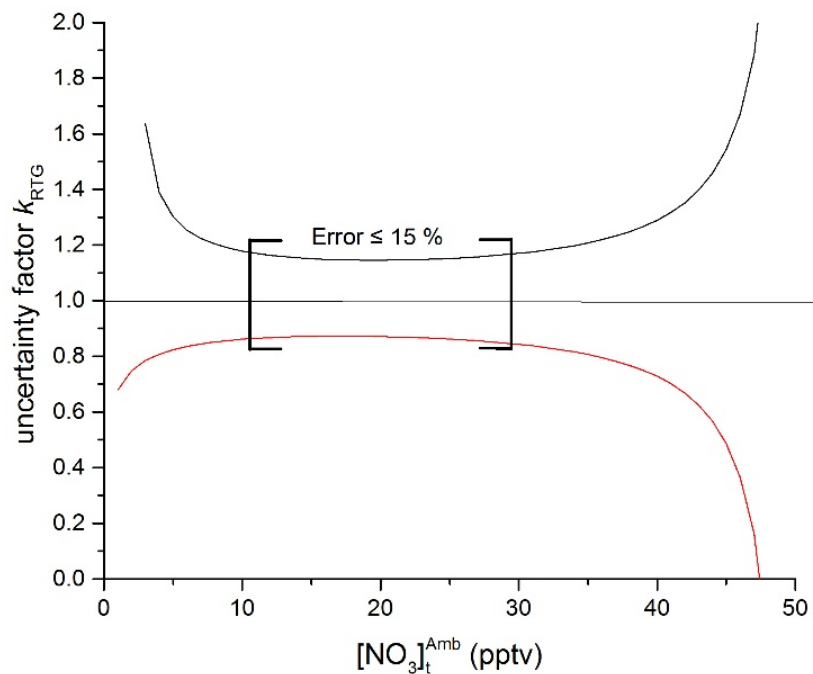

**Fig S1:** Upper and lower bounds to the uncertainty in the reactivity measurement calculated for a fixed minimal detectable change ( $MDC_{NO_3} = 2.5$  pptv) in  $NO_3$  (initially  $[NO_3]_t^{ZA} = 50$  pptv) for different reactivities resulting in various measured  $NO_3$  mixing ratios at 10.5 s ( $[NO_3]_t^{Amb}$ ). The straight line ( $y=1$ ) is the ideal case where the  $MDC_{NO_3}$  tends to zero. The square brackets indicate the dynamic range in which the uncertainty associated with signal stability is  $< \approx 15\%$ . When  $[NO_3]_t^{Amb}$  and  $[NO_3]_t^{ZA}$  are very similar (reactivity tends to zero) or when  $NO_3$  is entirely depleted (very high reactivity) the uncertainty increases rapidly.

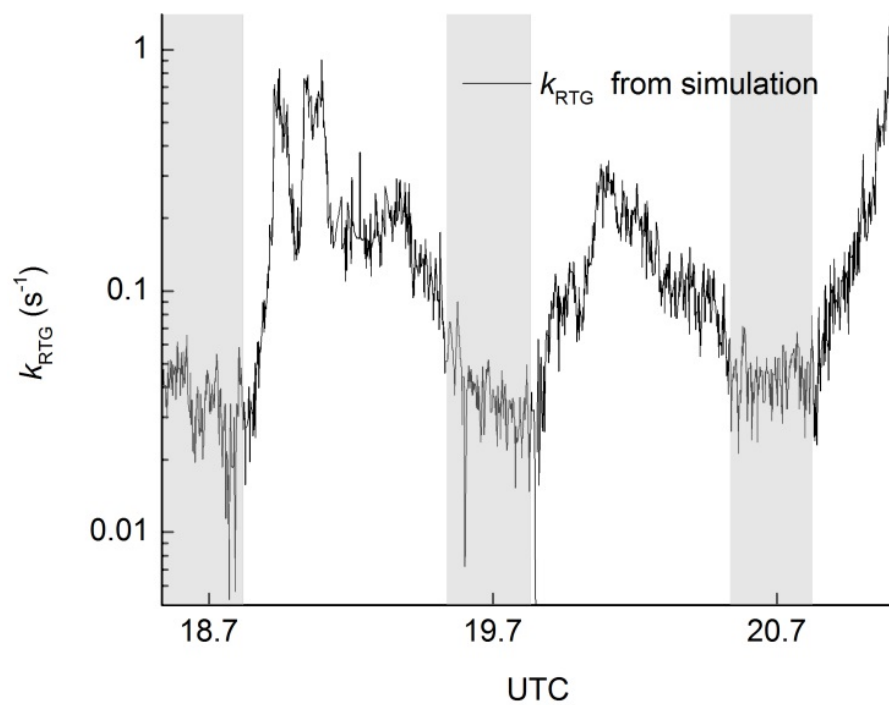

**Fig S2:** As Figure 12 in the manuscript but showing only  $k_{\text{RTG}}$  derived from simulation and with the y-axis in log scale.
